# Supplementary material
Source: PubMed Central journal article supplement (PMC5110367)
Supplement: NIHMS809303-supplement-1.pdf [file NIHMS809303-supplement-1.pdf]

**“Supplemental Information”**

**Identification and characterization of PPAR $\alpha$  ligands in the hippocampus**

**Avik Roy<sup>1</sup>, Madhuchhanda Kundu<sup>1</sup>, Malabendu Jana<sup>1</sup>, Rama K. Mishra<sup>2</sup>, Yeni Yung<sup>3</sup>,  
Chi-Hao Luan<sup>4</sup>, Frank J. Gonzalez<sup>5</sup>, Kalipada Pahan<sup>1,6</sup>**

<sup>1</sup>Department of Neurological Sciences, Rush University Medical Center, Chicago, IL;  
<sup>2</sup>Medicinal and Synthetic Chemistry Core, Center for Molecular Innovation and Drug Discovery,  
Northwestern University, Evanston, IL; <sup>3</sup>Research Resources Center, University of Illinois at  
Chicago, IL; <sup>4</sup>High Throughput Analysis Laboratory and Department of Molecular Biosciences,  
Northwestern University, Evanston, IL; <sup>5</sup>Laboratory of Metabolism, Center for Cancer Research,  
National Cancer Institute, National Institutes of Health, Bethesda, MD; <sup>6</sup>Division of Research  
and Development, Jesse Brown Veterans Affairs Medical Center, 820 South Damen Avenue,  
Chicago, IL

Running title: Hippocampal ligands of PPAR $\alpha$

To whom correspondence should be addressed:

Kalipada Pahan, Ph.D.  
Department of Neurological Sciences  
Rush University Medical Center  
1735 West Harrison St, Suite 310  
Chicago, IL 60612  
Telephone (312) 563-3592; Fax (312) 563-3571  
Email: [Kalipada\\_Pahan@rush.edu](mailto:Kalipada_Pahan@rush.edu)

Supplementary Table 1. List of physiologically available possible nuclear ligands of PPAR $\alpha$  in brain

| Class of Compounds                                  | MW      | Biosynthetic process                         | CAS Number |
|-----------------------------------------------------|---------|----------------------------------------------|------------|
| 3-Hydroxy-(2,2)-dimethyl butanoic acid, ethyl ester | 160.0   | Fatty acid Oxidation                         | 69737-23-1 |
| Thiosemicarbazones                                  | 190-200 | Unknown                                      | unknown    |
| Thiazoles                                           | 220-240 | Unknown                                      | unknown    |
| Thiazolidine esters                                 | 250-270 | Unknown                                      | unknown    |
| Hexadecanamide                                      | 255.01  | Very long chain Fatty acid $\beta$ oxidation | 629-54-9   |
| 9-octadecanamide                                    | 281.38  | Very long chain Fatty acid $\beta$ oxidation | 301-02-0   |

Supplementary Table 2. Peak integration statistics of mass spectrometric analyses for HEX and OCT in *Ppara*-null hippocampal neurons infected with lentivirions containing different *Ppara* constructs.

|     | Sample Name               | Ion, m/z | Peak R.T, minutes | Adjusted peak area | Peak area of Int. Standard | Rel. Abundance (RA) | %RA         |
|-----|---------------------------|----------|-------------------|--------------------|----------------------------|---------------------|-------------|
| HEX | Vector Only               | 255.01   | 13.71             | 17632              | 916408                     | 0.019240338         | 1.92        |
|     | FL- <i>Ppara</i>          | 255.01   | 13.7              | 23806805           | 989368                     | 24.06263898         | <b>2406</b> |
|     | Y314D- <i>Ppara</i>       | 255.23   | 13.7              | 637636             | 1710699                    | 0.372734186         | 37.3        |
|     | Y464D- <i>Ppara</i>       | 255.01   | 13.72             | 18646              | 1149966                    | 0.016214392         | 1.62        |
|     | Y314D/Y464D- <i>Ppara</i> | 255.17   | 13.71             | 6843               | 575146                     | 0.011897849         | 1.19        |
| OCT | Vector Only               | 281.13   | 14.49             | 79623              | 916408                     | 0.086885972         | 8.69        |
|     | FL- <i>Ppara</i>          | 280.97   | 14.5              | 24671057           | 989368                     | 24.93617845         | <b>2494</b> |
|     | Y314D- <i>Ppara</i>       | 281.23   | 14.51             | 827358             | 1710699                    | 0.48363739          | 48.4        |
|     | Y464D- <i>Ppara</i>       | 281.24   | 14.49             | 266871             | 1149966                    | 0.2320686           | 23.2        |
|     | Y314D/Y464D- <i>Ppara</i> | 281.05   | 14.49             | 128107             | 575146                     | 0.222738226         | 22.3        |

*Ppara*-null hippocampal neurons were transduced with lentivirions containing different *Ppara* constructs for 48 h followed by the affinity purification through GFP column. After that, the eluted fraction was fractionated with chloroform-methanol extraction procedure and the organic phase was analyzed by GCMS. Peaks for Hexadecanamide (HEX) and 9-octadecanamide (OCT) were analyzed and their detailed peak integration statistics were displayed above. Peak area was adjusted with baseline and then normalized with the peak area of the internal standard [2,4-Bis( $\alpha$ , $\alpha$ -dimethylbenzyl)phenol]. The normalized value was shown as the relative abundance and finally presented in a percent scale.

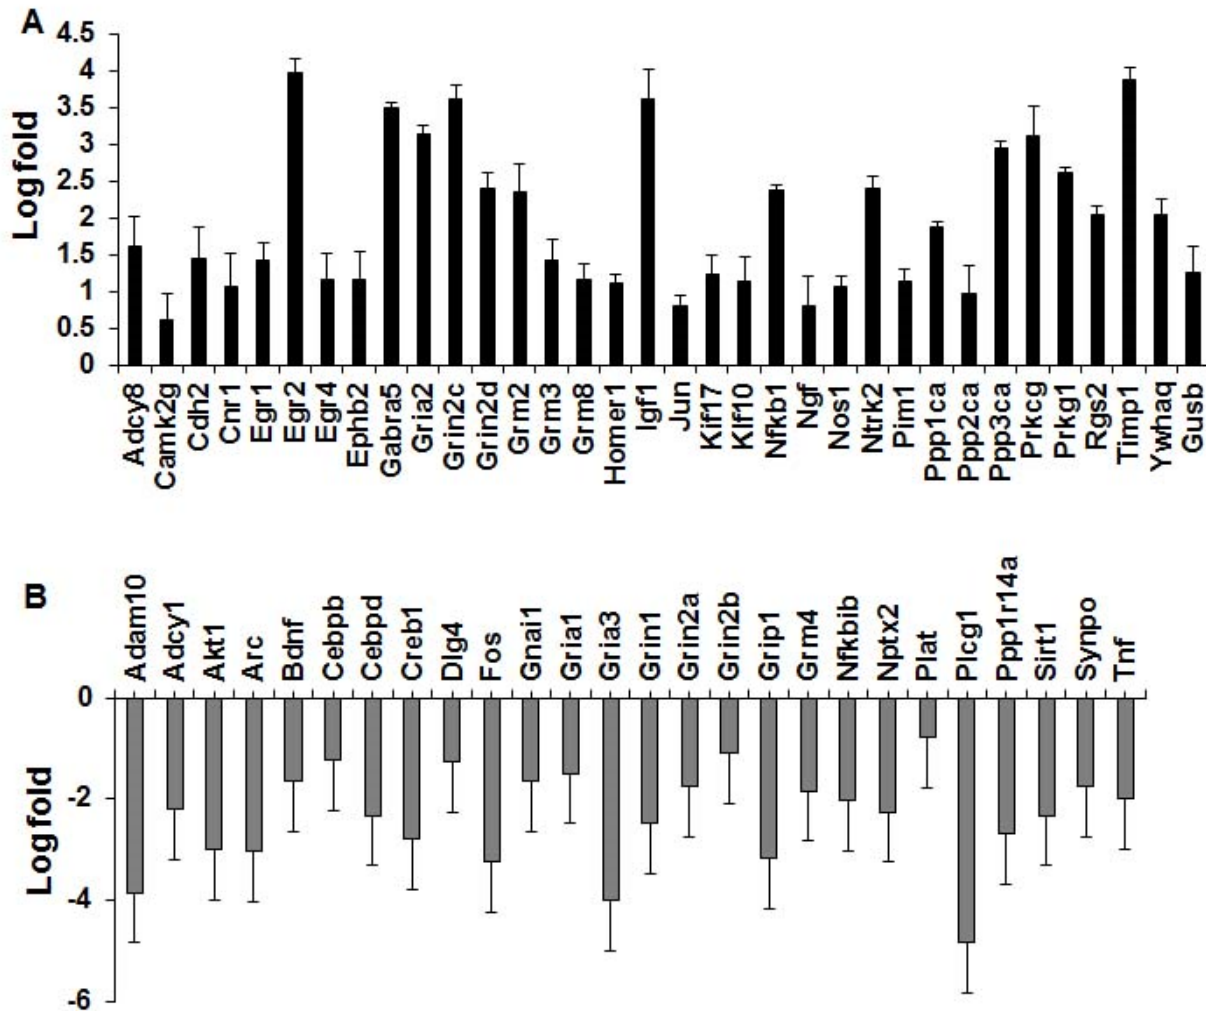

**Supplementary Figure 1. Modulation of synaptic molecules in the hippocampus of *Ppara*-null mice.** A) Histogram analysis represents the list of upregulated genes in the *Ppara*-null hippocampus as compared to wild type hippocampus plotted as fold change in log scale. B) The list of genes that was down-regulated in the hippocampus of *Ppara*-null mice as compared to wild type mice shown as fold change in log scale. Results are mean  $\pm$  SEM of three mice.

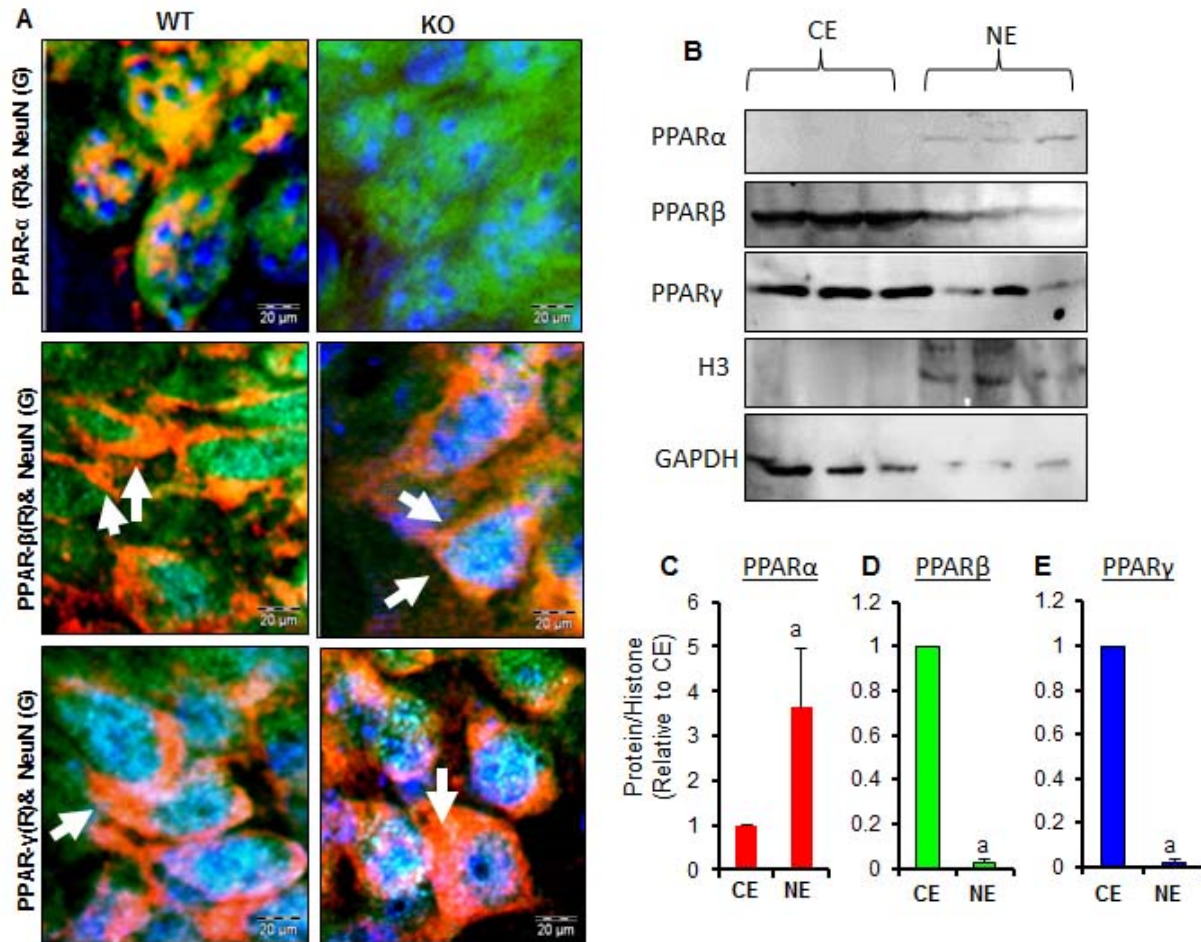

**Supplementary Figure 2. The subcellular localization of PPAR $\alpha$ ,  $\beta$  and  $\gamma$  isotypes in mouse brain hippocampus.** (A) The intracellular distribution of PPAR $\alpha$ ,  $\beta$  and  $\gamma$  were shown by immunofluorescence (NeuN, green; PPARs, red) analyses of the CA1 regions of hippocampus. (B) Nuclear-enriched (NE) and cytoplasmic enriched (CE) fractions of hippocampal tissues were immunoblotted for PPAR $\alpha$ ,  $\beta$ , and  $\gamma$ . Histone 3 (H3) and GAPDH were included for monitoring purity of nuclear extract and cytoplasmic extract, respectively. Immunoblot analyses were performed in three 6-8 weeks old male WT mice. Bands were scanned and protein/H3 values are presented as relative to CE (C, PPAR $\alpha$ ; D, PPAR $\beta$ ; E, PPAR $\gamma$ ). Results are mean  $\pm$  SEM of three mice. <sup>a</sup> $p < 0.0001$  vs CE.



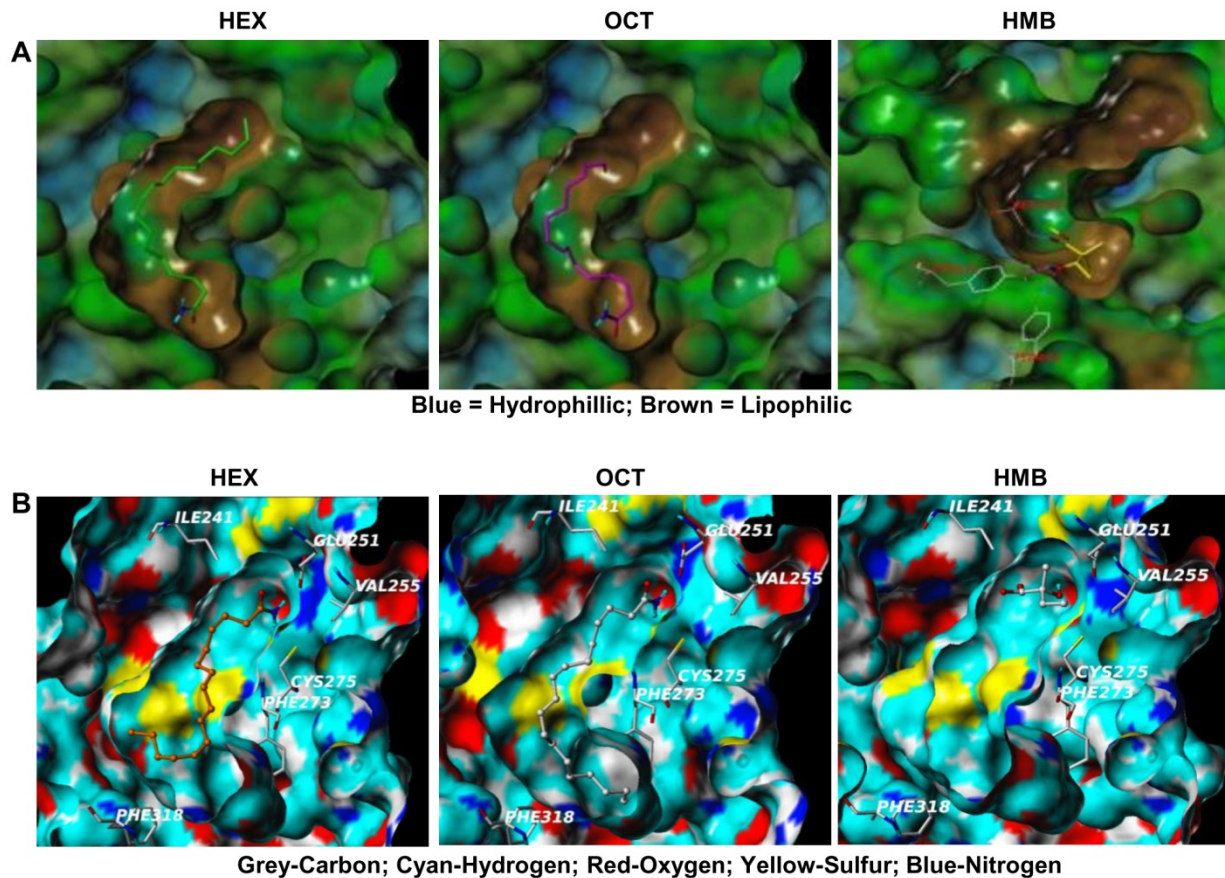

**Supplementary Figure 3. Electrostatic potential and atom-specific surfaces of PPAR $\alpha$  LBD.** (A) Electrostatic potential surface of PPAR $\alpha$  LBD docked with HEX (left), OCT (center) and HMB (right). Blue region represents hydrophilic environment, brown for lipophilic surroundings. All three ligands share mostly lipophilic environment (upper panels) with a very few hydrophilic patches). (B) Atom-specific surfaces of PPAR $\alpha$  LBD docked with three ligands. (Grey-Carbon; Cyan-Hydrogen; Red-Oxygen; Yellow-Sulfur; Blue-Nitrogen).

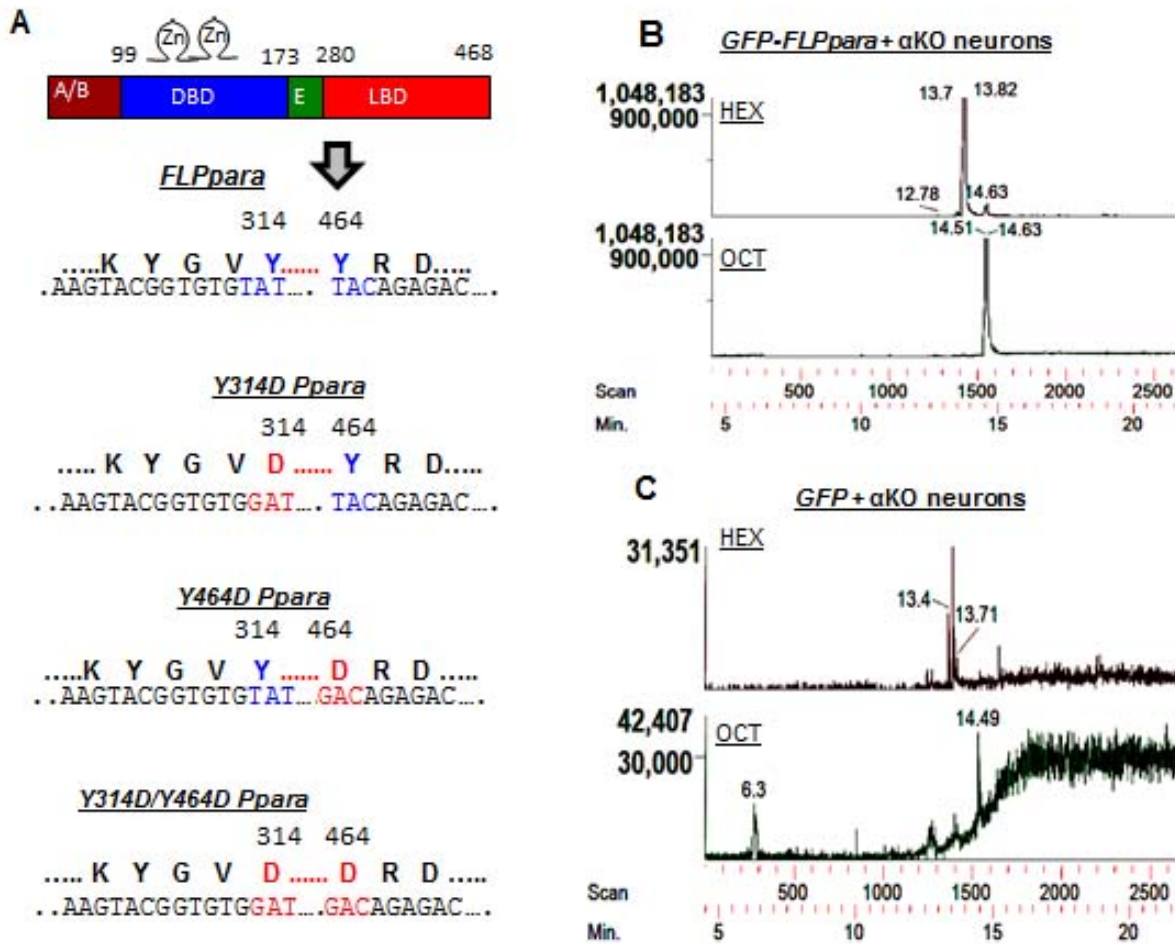

**Supplementary Figure 4. Maps of different constructs of PPAR.** A) Detailed maps of *FL-Ppara*, *Y314D-Ppara*, *Y464D-Ppara*, and *Y314D/Y464D-Ppara* are shown. GC-MS analyses in GFP-affinity purified extracts of *Ppara*-null hippocampal neurons transduced with lentiviruses containing *GFP-FL-Ppara* (B) and *GFP* (C).

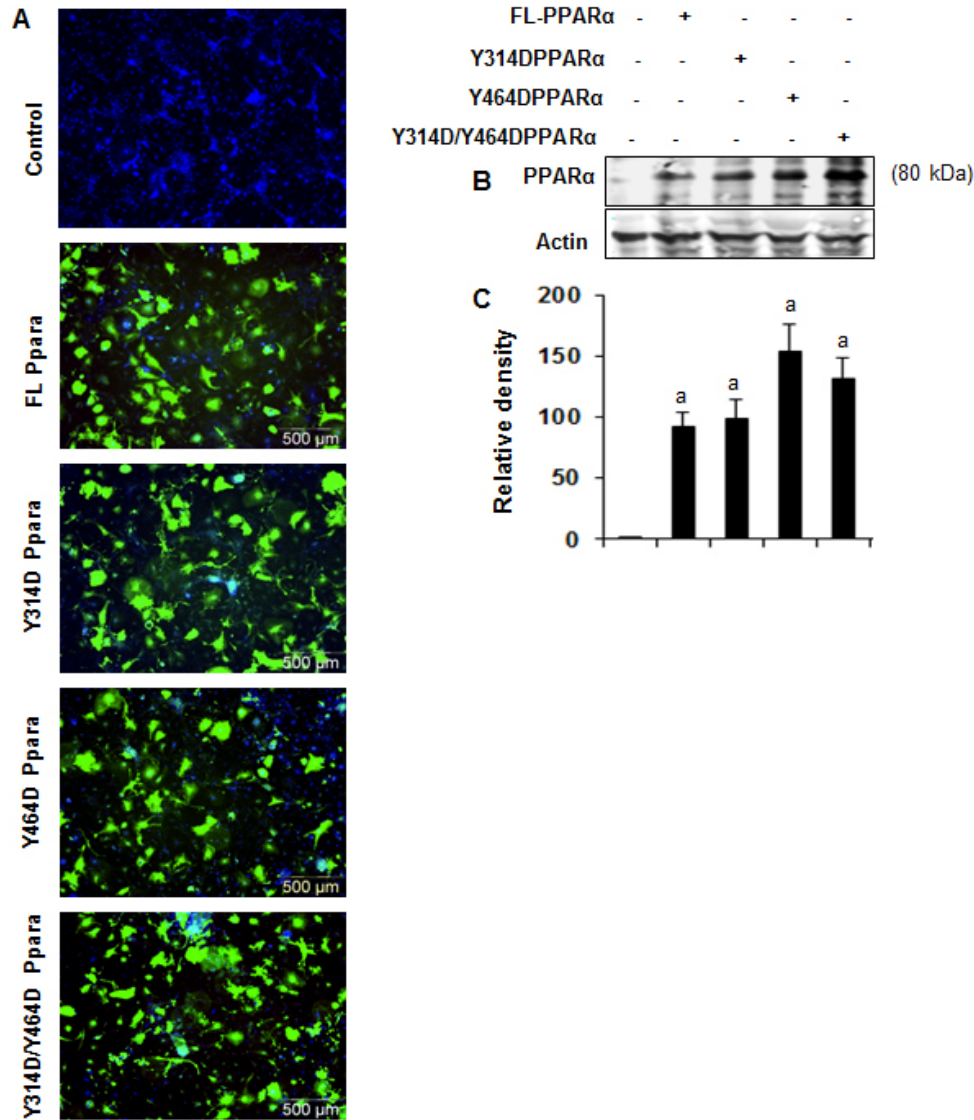

**Supplementary Figure 5. Transduction of *Ppara*-null astrocytes with lentiviruses containing different *Ppara* constructs.** A) *Ppara*-null astrocytes cultured on coverslips were transduced with lentiviruses containing *FL-Ppara*, *Y314D-Ppara*, *Y464D-Ppara*, and *Y314D/Y464D-Ppara*. Forty-eight h after transduction, level of GFP was monitored in an Olympus IX81 fluorescence microscope. DAPI was used to visualize nucleus. B) Similarly, 48 h after transduction, the level of PPAR $\alpha$  [PPAR $\alpha$  (53kDa) + GFP (27 kDa)] was monitored by Western blot. C) Bands were scanned and values (PPAR $\alpha$ /Actin) presented as relative to control. Results are mean  $\pm$  SD of three independent experiments. <sup>a</sup> $p < 0.0001$  vs control.

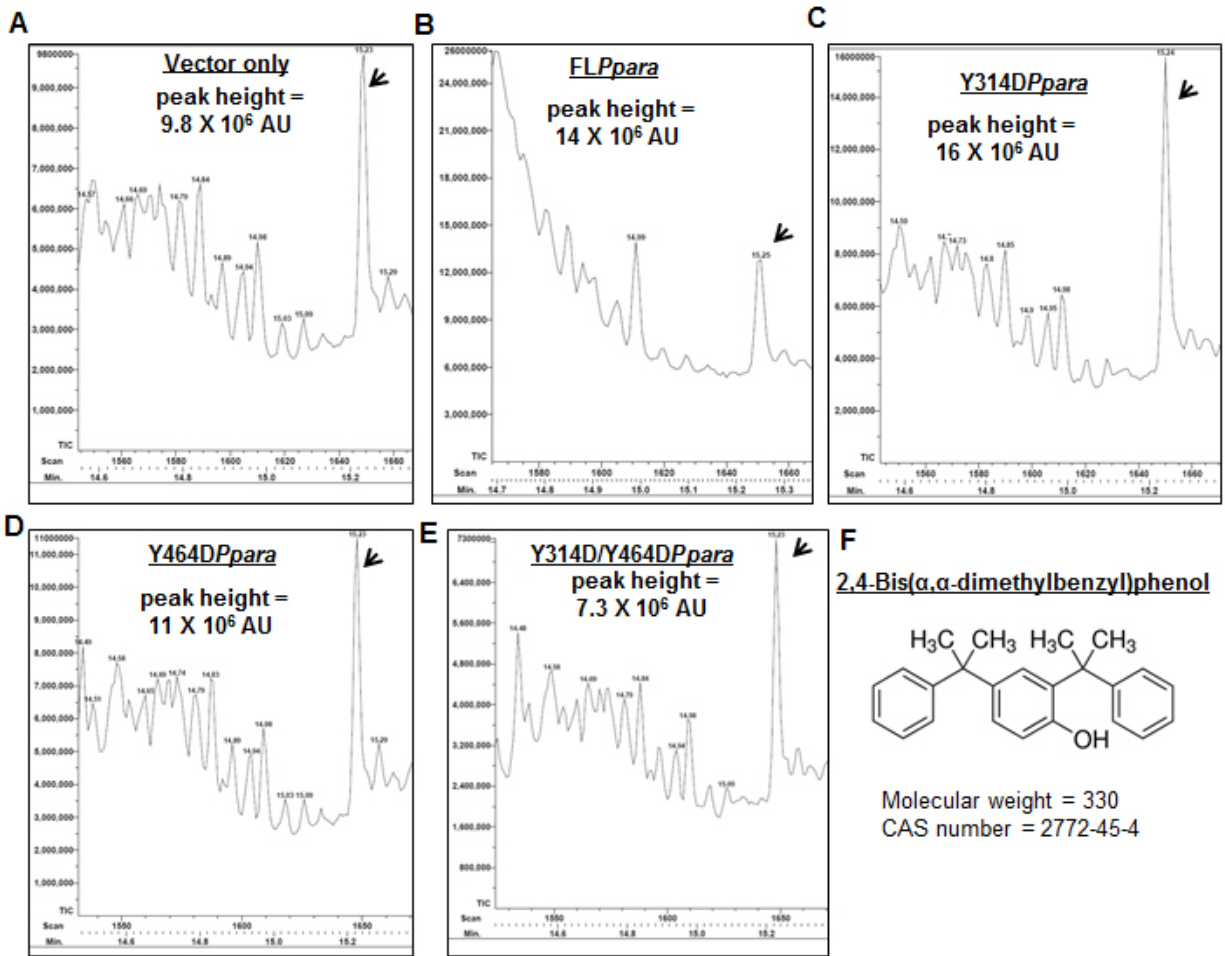

**Supplementary Figure 6. Peak integration statistics of GC-MS.** 2,4-Bis( $\alpha,\alpha$ -dimethylbenzyl)phenol was used as internal standard (arrowhead) in GC-MS analyses (A, vector only; B, *FL-Ppara*; C, *Y314D-Ppara*; D, *Y464D-Ppara*; E, *Y314D/Y464D-Ppara*). F) Chemical structure, molecular weight and CAS number of 2, 4-Bis ( $\alpha, \alpha$ -dimethylbenzyl) phenol.



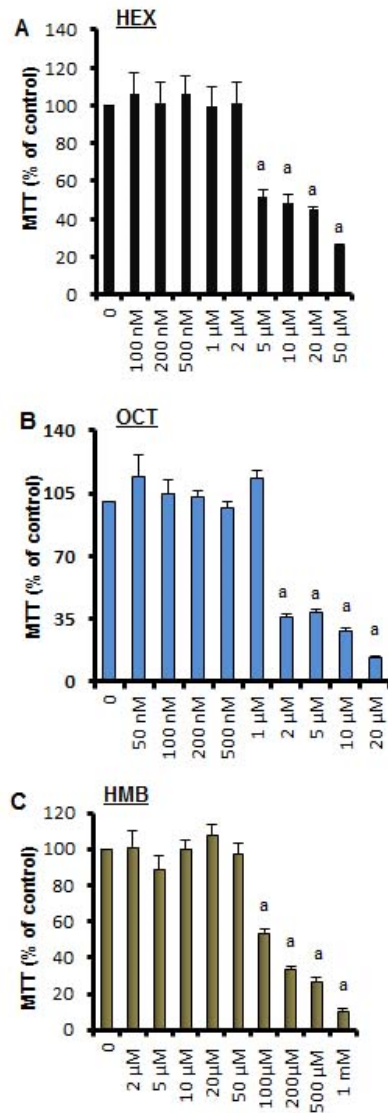

**Supplementary Figure 7. Effect of hippocampal ligands of PPAR $\alpha$  on the survival of primary mouse astrocytes.** Astrocytes plated at 60-70% confluence were transfected with *tk-PPREx3-Luc*, a PPRE-dependent luciferase reporter construct. After 24 h of transfection, cells were treated with different concentrations of HEX (A), OCT (B) and HMB (C) for 4 h followed by monitoring MTT assay to check cell viability. Results are mean  $\pm$  SD of three independent experiments. <sup>a</sup> $p < 0.001$  vs. control.

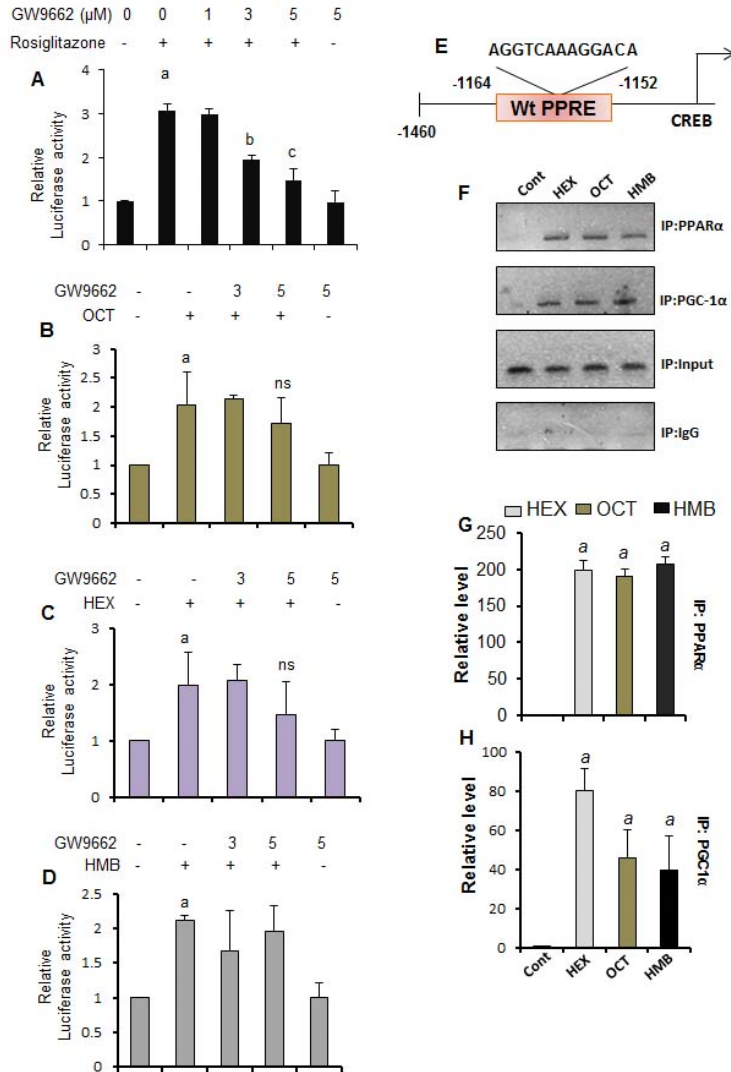

**Supplementary Figure 8. OCT, HEX and HMB induce PPRE-driven luciferase activity in *Pparb*-null astrocytes in the presence of PPAR $\gamma$  antagonist.** A) *Pparb*-null primary astrocytes plated at 60–70% confluence in 12-well plates were transfected with 0.25  $\mu$ g of *tkPPREx3-Luc* (a PPRE-dependent luciferase reporter construct). Twenty-four hours after transfection, cells were treated with different concentrations of GW9662 for 30 min followed by stimulation with rosiglitazone. After 4 h, luciferase activities were assayed. Data are mean  $\pm$  SD of three different experiments. <sup>a</sup> $p < 0.001$  versus control; <sup>b</sup> $p < 0.05$  & <sup>c</sup> $p < 0.01$  versus rosiglitazone. After transfection, cells were also treated with GW9662 followed by stimulation with OCT (B), HEX (C) and HMB (D). After 4 h, luciferase activities were assayed. <sup>a</sup> $p < 0.001$  versus control; ns, not significant. (E) Promoter map of CREB shows the presence of a consensus PPRE. ChIP analyses (F) followed by real-time (G) validation of CREB promoter after pulling down with PPAR $\alpha$  and PGC1 $\alpha$ . Data are mean  $\pm$  SD of three different experiments. <sup>a</sup> $p < 0.001$  versus control.

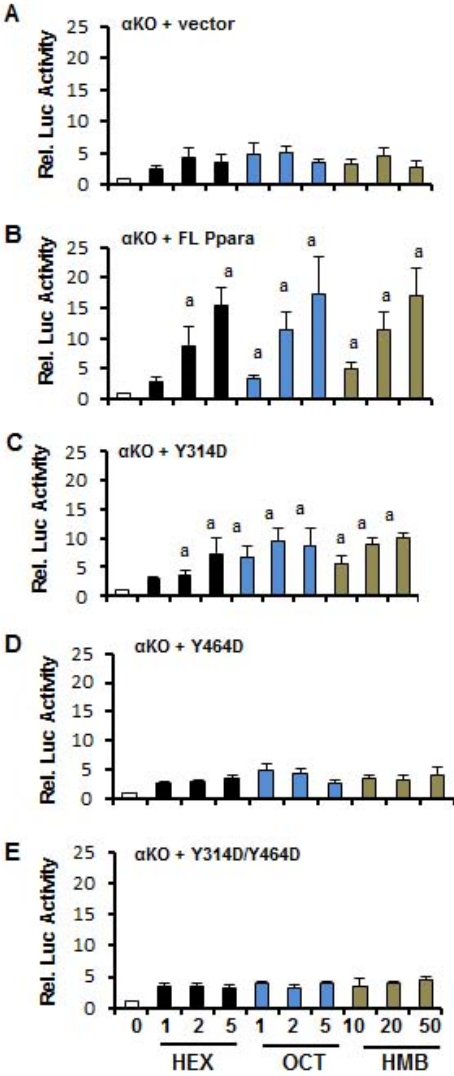

**Supplementary Figure 9. Hippocampal ligands of PPAR $\alpha$  induce PPRE-driven luciferase activity in primary mouse hippocampal neurons.** *Ppara*-null hippocampal neurons were transduced with lentiviruses containing empty vector (A), *FL-Ppara* (B), *Y314D-Ppara* (C), *Y464D-Ppara* (D), and *Y314D/Y464D-Ppara* (E) for 48 h followed by transfection with *tk-PPREx3-Luc*. After 24 h of transfection, cells were treated with different doses of HEX, OCT and HMB for 4 h followed by monitoring luciferase activity. Results are mean  $\pm$  SD of three independent experiments. <sup>a</sup> $p < 0.001$  vs. control.

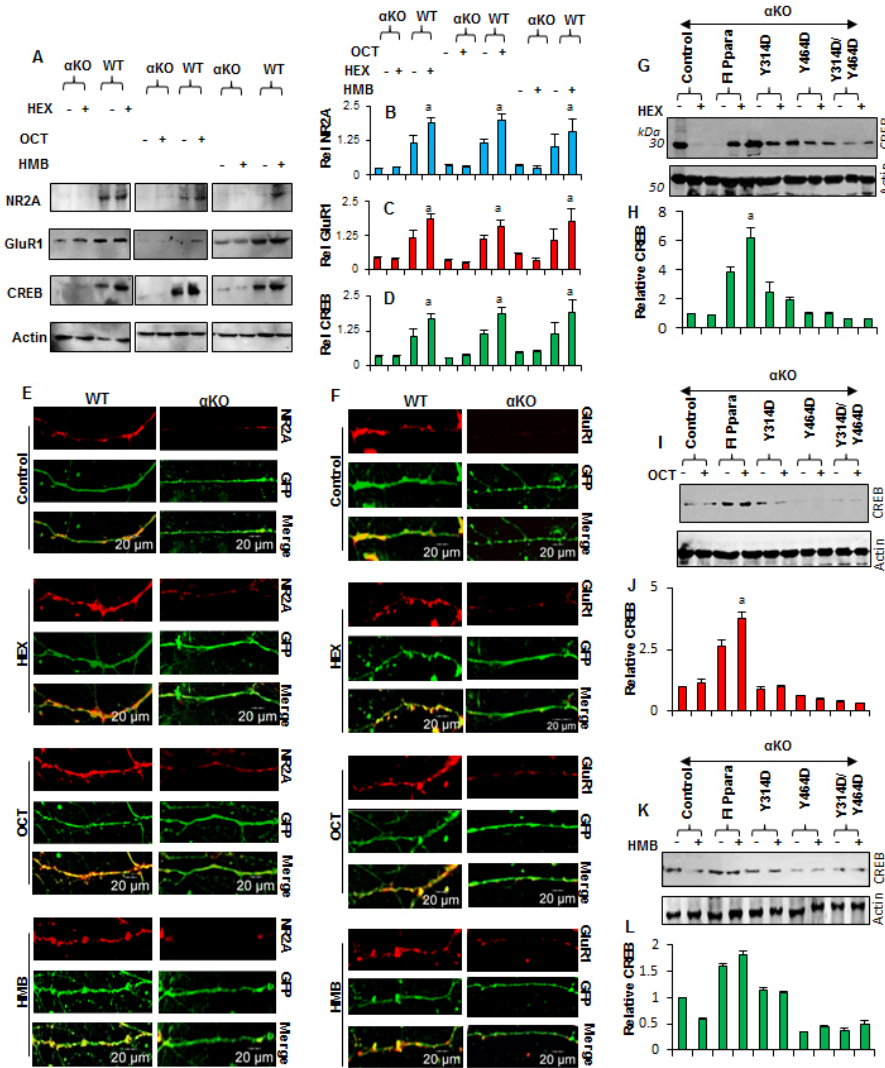

**Supplementary Figure 10. Effect of HEX, OCT and HMB on the expression of synaptic molecules in *Ppara*-null hippocampal neurons and neurons transduced with different *Ppara* constructs.** (A) Immunoblot analyses followed by densitometric analyses of NR2A (B), GluR1 (C) and CREB (D) were performed in *Ppara*-null and WT hippocampal neurons treated with 5  $\mu$ M HEX, 5  $\mu$ M OCT and 50  $\mu$ M HMB. Data are mean  $\pm$  SD of three different experiments. <sup>a</sup> $p < 0.05$  versus WT-control. Immunocytochemical analyses of NR2A (E) and GluR1 (F) in WT and *Ppara*-null hippocampal neurons treated with HEX, OCT and HMB. Hippocampal neurons were transduced with lenti-GFP for 48 h followed by treatment with different ligands. Immunoblot analyses followed by relative densitometric analyses of CREB in *Ppara*-null hippocampal neurons transduced with lentiviruses containing different *Ppara* constructs followed by treatment with HEX (G-H), OCT (I-J) and HMB (K-L). Bands were scanned and presented as relative to control (H, HEX; J, OCT; L, HMB). Data are mean  $\pm$  SD of three different experiments. <sup>a</sup> $p < 0.05$  vs FL-*Ppara* control.



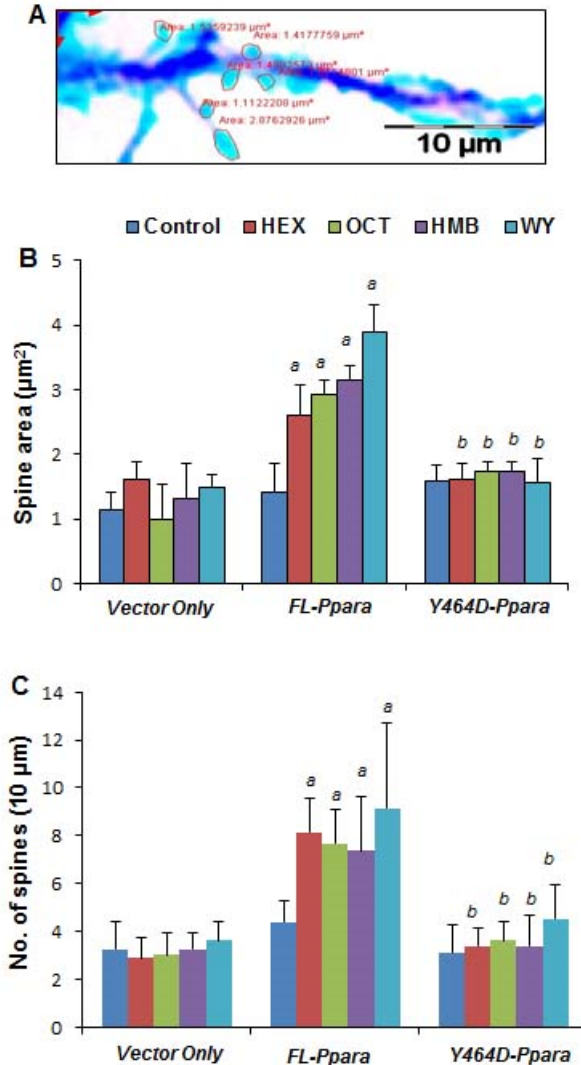

**Supplementary Figure 11. Hippocampal ligands of PPAR $\alpha$  stimulate morphological plasticity in hippocampal neurons.** *Ppara*-null hippocampal neurons were transduced with lentiviruses containing GFP (vector), *FL-Ppara* and *Y464D-Ppara* for 48 h followed by treatment with HEX, OCT, HMB, and WY14643 for 24 h. Then neurons were stained for phalloidin to measure spine density. A) A representative picture of dendrite with spines (Cyan color) used for counting area and number of spines. Area of spine heads (B) and number of spines (C) in 10  $\mu\text{m}$  dendrites were quantified. Results are mean  $\pm$  SEM of 5 neurons per group. <sup>a</sup> $p < 0.05$  vs vector only; <sup>b</sup> $p < 0.05$  vs *FL-Ppara*.

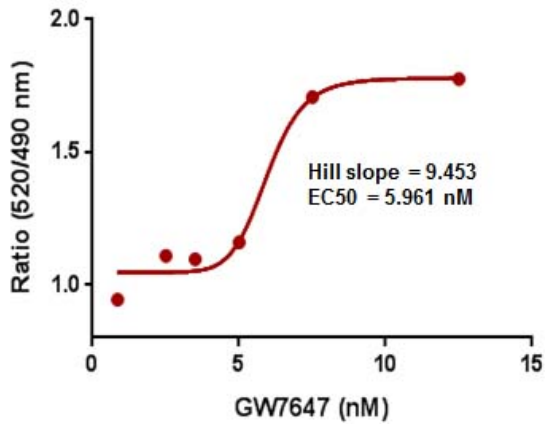

**Supplementary Figure 12. Analysis of the interaction of GW7647 with PPAR $\alpha$  by TR-FRET.** TR-FRET analysis was performed and dose response curves were plotted as a ratio of fluorescence response with increasing doses of agonists. Graph-pad prism 7 software was used to draw a sigmoidal curve-fit. Respective EC50 and hill slope values were calculated based on sigmoidal curve-fit equation, indicated as  $Y = \text{Bottom} + \frac{(X^{\text{Hillslope}}) * (\text{Top} - \text{Bottom})}{(X^{\text{Hillslope}} + \text{EC50}^{\text{Hillslope}})$ .

**A** Raw blots for figure 1F

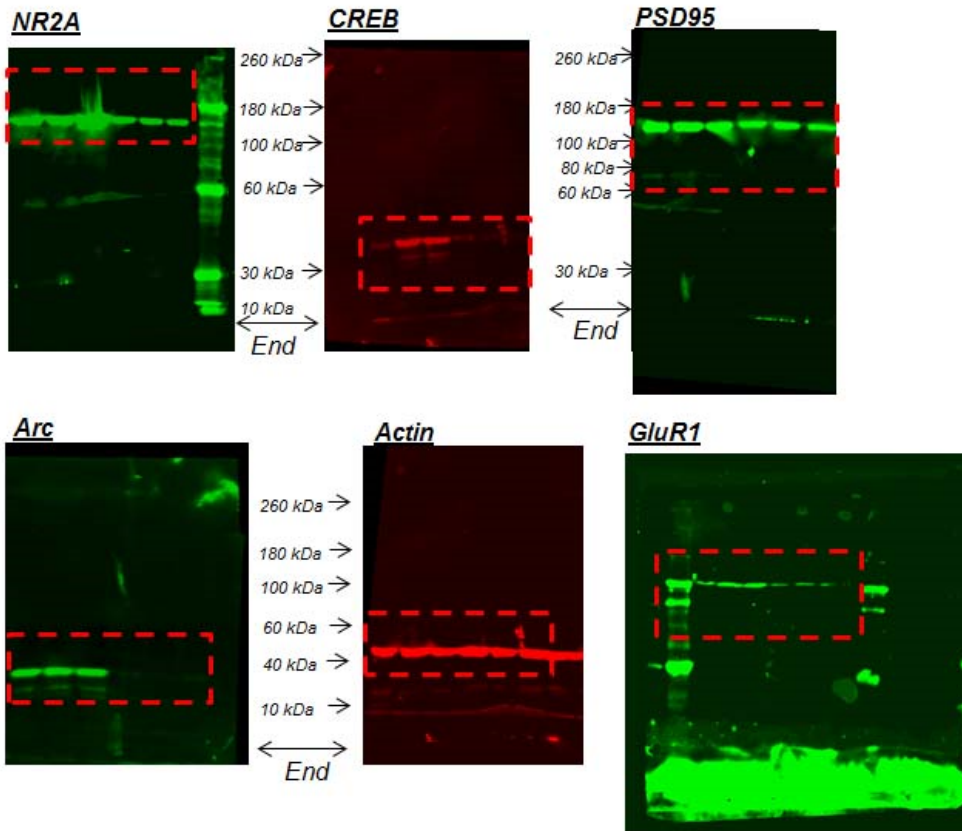

**B** Raw blots for figure 2F

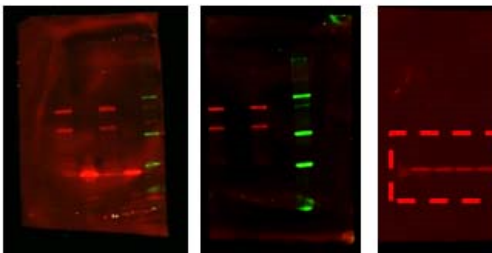

**C** Raw blot for figure 2I

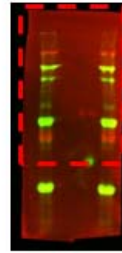

Supplementary Figure 13. Uncut images of Western blots used in main figures. (A, Figure 1H; B, Figure 2F; C, Figure 2I).
